# Supplementary material for: Backbone phylogeny and adaptive evolution of Pleurospermum s. l.: New insights from phylogenomic analyses of complete plastome data
Source: Front Plant Sci. 2023 Mar 30;14:1148303. doi: 10.3389/fpls.2023.1148303 (PMC10101341; doi:10.3389/fpls.2023.1148303)
Supplement: Supplementary file 11 [file Table_6.xlsx]

## Sheet: Table S5
Table S6 relative synonymous codon usage (RSCU) values and base composition of protein-coding genes of the 43 plastomes.
taxa	GC(%)			Phe		Leu						Ile			Met	Val				Ser						Pro				Thr				Ala				Tyr		His		Gln		Asn		Lys		Asp
	Total	Pos-2	Pos-3	UUU	UUC	UUA	UUG	CUU	CUC	CUA	CUG	AUU	AUC	AUA	AUG	GUU	GUC	GUA	GUG	UCU	UCC	UCA	UCG	AGU	AGC	CCU	CCC	CCA	CCG	ACU	ACC	ACA	ACG	GCU	GCC	GCA	GCG	UAU	UAC	CAU	CAC	CAA	CAG	AAU	AAC	AAA	AAG	GAU	GAC
P. uralense	0.389	0.404	0.308	1.33	0.67	1.96	1.22	1.19	0.48	0.77	0.38	1.44	0.69	0.87	1	1.51	0.64	1.31	0.55	1.56	0.9	1.24	0.72	1	0.59	1.52	0.74	1.09	0.65	1.36	0.81	1.19	0.64	1.68	0.77	1	0.55	1.47	0.53	1.49	0.51	1.49	0.51	1.43	0.57	1.49	0.51	1.55	0.45
P. uralense	0.389	0.404	0.308	1.33	0.67	1.97	1.22	1.19	0.48	0.77	0.39	1.44	0.69	0.87	1	1.51	0.63	1.31	0.55	1.56	0.89	1.24	0.72	1	0.6	1.51	0.76	1.09	0.65	1.36	0.81	1.19	0.64	1.67	0.78	1	0.55	1.47	0.53	1.49	0.51	1.49	0.51	1.43	0.57	1.49	0.51	1.55	0.45
P. davidii	0.388	0.403	0.307	1.32	0.68	1.97	1.19	1.19	0.46	0.79	0.39	1.44	0.69	0.86	1	1.52	0.63	1.3	0.55	1.55	0.89	1.26	0.72	0.99	0.59	1.49	0.74	1.1	0.67	1.34	0.81	1.2	0.66	1.67	0.78	1	0.56	1.47	0.53	1.48	0.52	1.5	0.5	1.43	0.57	1.49	0.51	1.56	0.44
P. linearilobum	0.388	0.403	0.308	1.32	0.68	1.95	1.21	1.2	0.45	0.79	0.4	1.45	0.69	0.86	1	1.53	0.63	1.29	0.55	1.56	0.89	1.27	0.71	0.98	0.6	1.49	0.74	1.1	0.67	1.34	0.81	1.21	0.63	1.65	0.78	1.01	0.55	1.47	0.53	1.49	0.51	1.49	0.51	1.43	0.57	1.48	0.52	1.55	0.45
P. foetens	0.388	0.403	0.307	1.33	0.67	1.95	1.21	1.21	0.45	0.79	0.4	1.44	0.69	0.87	1	1.53	0.63	1.29	0.55	1.56	0.89	1.26	0.72	0.98	0.6	1.49	0.74	1.1	0.67	1.35	0.81	1.21	0.63	1.66	0.78	1.01	0.55	1.47	0.53	1.49	0.51	1.49	0.51	1.43	0.57	1.48	0.52	1.55	0.45
P. heracleifolium	0.388	0.403	0.307	1.32	0.68	1.97	1.19	1.19	0.46	0.79	0.4	1.45	0.69	0.87	1	1.52	0.63	1.3	0.56	1.54	0.89	1.26	0.71	0.98	0.61	1.49	0.75	1.09	0.67	1.35	0.8	1.2	0.64	1.68	0.77	1	0.55	1.47	0.53	1.49	0.51	1.49	0.51	1.43	0.57	1.49	0.51	1.56	0.44
P. scezchenyii	0.388	0.403	0.307	1.32	0.68	1.96	1.2	1.19	0.47	0.79	0.4	1.44	0.69	0.87	1	1.52	0.63	1.29	0.56	1.54	0.89	1.27	0.71	0.99	0.59	1.49	0.74	1.09	0.67	1.34	0.8	1.21	0.65	1.67	0.79	0.99	0.55	1.47	0.53	1.49	0.51	1.49	0.51	1.43	0.57	1.49	0.51	1.56	0.44
P. wrightianum	0.388	0.402	0.308	1.33	0.67	1.96	1.2	1.2	0.47	0.79	0.4	1.44	0.69	0.87	1	1.52	0.63	1.29	0.56	1.54	0.89	1.27	0.71	0.99	0.6	1.5	0.74	1.1	0.66	1.35	0.81	1.2	0.64	1.66	0.79	1	0.55	1.47	0.53	1.5	0.5	1.49	0.51	1.43	0.57	1.49	0.51	1.56	0.44
P. benthaimii	0.389	0.403	0.308	1.33	0.67	1.95	1.2	1.19	0.47	0.79	0.4	1.43	0.7	0.87	1	1.53	0.62	1.3	0.55	1.55	0.89	1.27	0.7	0.99	0.59	1.5	0.73	1.1	0.66	1.35	0.81	1.19	0.65	1.67	0.77	1	0.56	1.47	0.53	1.49	0.51	1.49	0.51	1.42	0.58	1.49	0.51	1.56	0.44
P. decurrens DL	0.388	0.403	0.308	1.32	0.68	1.95	1.2	1.2	0.46	0.79	0.39	1.45	0.69	0.86	1	1.52	0.63	1.3	0.56	1.54	0.88	1.26	0.72	0.99	0.6	1.5	0.73	1.11	0.66	1.35	0.81	1.2	0.65	1.66	0.79	1	0.55	1.47	0.53	1.49	0.51	1.49	0.51	1.43	0.57	1.49	0.51	1.55	0.45
P. decurrens KM	0.388	0.403	0.308	1.33	0.67	1.96	1.21	1.19	0.45	0.79	0.4	1.44	0.68	0.88	1	1.54	0.63	1.28	0.56	1.53	0.9	1.26	0.72	1	0.6	1.51	0.74	1.09	0.67	1.35	0.8	1.21	0.65	1.65	0.78	1.01	0.56	1.48	0.52	1.48	0.52	1.49	0.51	1.42	0.58	1.49	0.51	1.55	0.45
P. wilsonii YJ	0.388	0.402	0.308	1.33	0.67	1.96	1.22	1.18	0.47	0.79	0.38	1.45	0.68	0.87	1	1.52	0.61	1.31	0.56	1.55	0.89	1.26	0.71	0.99	0.6	1.49	0.73	1.1	0.68	1.34	0.82	1.2	0.64	1.65	0.8	1	0.55	1.47	0.53	1.49	0.51	1.48	0.52	1.43	0.57	1.49	0.51	1.55	0.45
P. wilsonii KD	0.388	0.402	0.308	1.33	0.67	1.95	1.22	1.19	0.47	0.79	0.38	1.45	0.68	0.87	1	1.53	0.61	1.31	0.56	1.55	0.89	1.26	0.71	0.99	0.6	1.48	0.73	1.1	0.69	1.34	0.83	1.19	0.64	1.65	0.79	1	0.55	1.47	0.53	1.49	0.51	1.48	0.52	1.42	0.58	1.49	0.51	1.55	0.45
P. kinddon-wardii	0.389	0.402	0.308	1.33	0.67	1.96	1.21	1.19	0.46	0.79	0.39	1.45	0.68	0.87	1	1.53	0.62	1.3	0.55	1.54	0.91	1.25	0.72	0.98	0.59	1.47	0.75	1.09	0.68	1.34	0.82	1.2	0.64	1.65	0.79	1.01	0.55	1.47	0.53	1.49	0.51	1.48	0.52	1.43	0.57	1.49	0.51	1.55	0.45
P. obtusiuscula	0.389	0.403	0.308	1.33	0.67	1.96	1.21	1.19	0.46	0.79	0.39	1.45	0.68	0.87	1	1.53	0.62	1.3	0.55	1.54	0.9	1.26	0.72	0.99	0.59	1.47	0.75	1.09	0.68	1.34	0.82	1.2	0.64	1.65	0.79	1.01	0.55	1.47	0.53	1.49	0.51	1.48	0.52	1.42	0.58	1.49	0.51	1.55	0.45
A. anomalum	0.388	0.403	0.308	1.33	0.67	1.97	1.21	1.19	0.47	0.78	0.39	1.44	0.69	0.87	1	1.51	0.62	1.3	0.57	1.56	0.9	1.25	0.71	0.99	0.59	1.47	0.75	1.1	0.68	1.35	0.81	1.19	0.65	1.64	0.81	1	0.56	1.47	0.53	1.49	0.51	1.48	0.52	1.43	0.57	1.49	0.51	1.55	0.45
P. cristatum	0.389	0.403	0.309	1.33	0.67	1.97	1.2	1.19	0.47	0.78	0.4	1.45	0.68	0.87	1	1.53	0.63	1.27	0.57	1.55	0.89	1.25	0.72	0.99	0.6	1.47	0.75	1.09	0.68	1.33	0.8	1.21	0.65	1.65	0.79	1.01	0.55	1.46	0.54	1.49	0.51	1.49	0.51	1.43	0.57	1.49	0.51	1.55	0.45
P. hedinii	0.388	0.403	0.308	1.33	0.67	1.96	1.22	1.19	0.46	0.78	0.39	1.44	0.69	0.87	1	1.53	0.62	1.3	0.55	1.54	0.9	1.29	0.68	1	0.59	1.48	0.75	1.11	0.67	1.34	0.81	1.21	0.65	1.64	0.8	1.01	0.55	1.47	0.53	1.49	0.51	1.48	0.52	1.43	0.57	1.49	0.51	1.55	0.45
Ph. delavayi ZD	0.389	0.403	0.309	1.33	0.67	1.96	1.21	1.19	0.45	0.79	0.41	1.45	0.68	0.87	1	1.53	0.61	1.31	0.55	1.54	0.89	1.25	0.72	1	0.6	1.46	0.77	1.09	0.68	1.34	0.83	1.2	0.63	1.65	0.81	0.98	0.56	1.48	0.52	1.48	0.52	1.49	0.51	1.43	0.57	1.49	0.51	1.54	0.46
Ph. delavayi LJ	0.389	0.403	0.309	1.33	0.67	1.96	1.2	1.19	0.44	0.79	0.41	1.45	0.68	0.87	1	1.53	0.61	1.31	0.55	1.54	0.89	1.25	0.72	1	0.6	1.46	0.77	1.09	0.67	1.34	0.83	1.2	0.63	1.64	0.81	0.98	0.57	1.48	0.52	1.49	0.51	1.49	0.51	1.43	0.57	1.49	0.51	1.54	0.46
Ph. nana LP	0.388	0.402	0.308	1.34	0.66	1.95	1.19	1.21	0.45	0.78	0.41	1.43	0.7	0.87	1	1.54	0.59	1.32	0.54	1.53	0.9	1.26	0.73	1	0.59	1.47	0.75	1.1	0.68	1.34	0.82	1.2	0.64	1.64	0.81	0.99	0.56	1.47	0.53	1.49	0.51	1.5	0.5	1.43	0.57	1.5	0.5	1.54	0.46
Ph. nana DQ	0.388	0.403	0.308	1.34	0.66	1.96	1.19	1.21	0.45	0.78	0.41	1.43	0.7	0.87	1	1.54	0.59	1.32	0.54	1.53	0.9	1.26	0.72	1	0.59	1.47	0.75	1.1	0.68	1.34	0.82	1.2	0.64	1.64	0.81	0.99	0.56	1.47	0.53	1.48	0.52	1.5	0.5	1.44	0.56	1.49	0.51	1.54	0.46
Ph. rubrinervis	0.388	0.403	0.309	1.33	0.67	1.97	1.21	1.2	0.45	0.78	0.39	1.43	0.69	0.88	1	1.54	0.61	1.3	0.55	1.53	0.91	1.25	0.73	1	0.59	1.45	0.76	1.11	0.68	1.34	0.82	1.2	0.64	1.64	0.82	0.99	0.55	1.47	0.53	1.49	0.51	1.48	0.52	1.43	0.57	1.5	0.5	1.54	0.46
Ph. shaniana	0.389	0.403	0.309	1.34	0.66	1.97	1.21	1.2	0.45	0.78	0.39	1.45	0.68	0.87	1	1.54	0.61	1.3	0.55	1.54	0.91	1.24	0.72	1.01	0.59	1.44	0.76	1.1	0.7	1.32	0.83	1.21	0.64	1.62	0.83	0.98	0.56	1.47	0.53	1.49	0.51	1.49	0.51	1.43	0.57	1.5	0.5	1.54	0.46
Ph. muliensis	0.389	0.403	0.31	1.33	0.67	1.94	1.22	1.2	0.46	0.79	0.4	1.44	0.69	0.87	1	1.53	0.62	1.3	0.56	1.54	0.9	1.24	0.74	1	0.58	1.46	0.76	1.1	0.68	1.35	0.82	1.21	0.63	1.65	0.82	0.97	0.56	1.47	0.53	1.49	0.51	1.49	0.51	1.43	0.57	1.49	0.51	1.54	0.46
P. bicolor	0.387	0.402	0.306	1.33	0.67	1.95	1.23	1.19	0.47	0.77	0.39	1.45	0.68	0.87	1	1.52	0.62	1.31	0.54	1.53	0.89	1.28	0.73	0.99	0.57	1.51	0.74	1.09	0.66	1.36	0.81	1.2	0.64	1.65	0.79	1.01	0.56	1.48	0.52	1.49	0.51	1.5	0.5	1.43	0.57	1.49	0.51	1.56	0.44
P. amabile	0.386	0.401	0.305	1.32	0.68	2	1.19	1.19	0.47	0.78	0.37	1.46	0.67	0.88	1	1.52	0.63	1.29	0.56	1.54	0.88	1.26	0.71	1	0.59	1.54	0.71	1.1	0.65	1.34	0.8	1.21	0.65	1.66	0.76	1.02	0.55	1.47	0.53	1.48	0.52	1.48	0.52	1.42	0.58	1.5	0.5	1.56	0.44
P. tsekuense	0.386	0.401	0.305	1.32	0.68	2	1.2	1.19	0.47	0.78	0.37	1.46	0.67	0.87	1	1.52	0.63	1.3	0.55	1.55	0.88	1.27	0.71	1	0.59	1.53	0.72	1.1	0.65	1.35	0.79	1.22	0.64	1.66	0.77	1.02	0.55	1.47	0.53	1.48	0.52	1.48	0.52	1.42	0.58	1.5	0.5	1.57	0.43
P. amabile DQ	0.388	0.402	0.307	1.31	0.69	1.99	1.19	1.18	0.48	0.79	0.38	1.47	0.67	0.85	1	1.51	0.63	1.3	0.56	1.51	0.89	1.26	0.73	1.01	0.6	1.52	0.74	1.1	0.65	1.33	0.8	1.23	0.64	1.66	0.75	1.01	0.57	1.47	0.53	1.48	0.52	1.48	0.52	1.42	0.58	1.5	0.5	1.56	0.44
H. pachycaule	0.387	0.401	0.306	1.32	0.68	1.99	1.2	1.19	0.47	0.78	0.37	1.46	0.66	0.87	1	1.53	0.63	1.29	0.55	1.55	0.89	1.27	0.71	0.99	0.6	1.52	0.73	1.09	0.66	1.34	0.81	1.22	0.64	1.67	0.76	1.01	0.57	1.47	0.53	1.48	0.52	1.48	0.52	1.42	0.58	1.49	0.51	1.57	0.43
P. pulszkyi	0.387	0.402	0.305	1.32	0.68	1.99	1.2	1.19	0.47	0.78	0.37	1.46	0.67	0.87	1	1.53	0.62	1.3	0.55	1.54	0.9	1.28	0.71	0.99	0.59	1.53	0.71	1.09	0.66	1.34	0.79	1.23	0.64	1.66	0.77	1.01	0.56	1.47	0.53	1.48	0.52	1.48	0.52	1.42	0.58	1.5	0.5	1.56	0.44
P. angelicoides	0.387	0.402	0.306	1.33	0.67	2	1.21	1.16	0.48	0.78	0.37	1.47	0.67	0.86	1	1.52	0.62	1.31	0.56	1.54	0.9	1.28	0.72	0.98	0.59	1.5	0.74	1.13	0.63	1.37	0.79	1.21	0.63	1.63	0.78	1.02	0.57	1.47	0.53	1.49	0.51	1.48	0.52	1.44	0.56	1.5	0.5	1.56	0.44
Pt. forrestii	0.387	0.402	0.306	1.32	0.68	1.99	1.21	1.18	0.47	0.77	0.37	1.46	0.69	0.86	1	1.52	0.62	1.3	0.56	1.54	0.9	1.28	0.71	0.98	0.59	1.49	0.73	1.13	0.65	1.36	0.8	1.21	0.63	1.64	0.77	1.03	0.56	1.47	0.53	1.48	0.52	1.48	0.52	1.44	0.56	1.49	0.51	1.56	0.44
P. rotundatum	0.387	0.402	0.306	1.32	0.68	1.99	1.2	1.19	0.47	0.78	0.38	1.45	0.68	0.86	1	1.51	0.62	1.31	0.56	1.53	0.9	1.27	0.72	0.99	0.59	1.49	0.74	1.14	0.63	1.37	0.79	1.21	0.62	1.64	0.77	1.03	0.56	1.47	0.53	1.48	0.52	1.49	0.51	1.44	0.56	1.49	0.51	1.56	0.44
H. dentatum	0.385	0.4	0.303	1.34	0.66	2	1.19	1.2	0.46	0.77	0.37	1.47	0.65	0.88	1	1.51	0.63	1.33	0.54	1.55	0.87	1.24	0.75	1.01	0.58	1.51	0.69	1.13	0.67	1.4	0.8	1.23	0.57	1.67	0.74	1.02	0.58	1.48	0.52	1.48	0.52	1.49	0.51	1.42	0.58	1.49	0.51	1.57	0.43
P. rivulorum	0.385	0.4	0.304	1.34	0.66	2	1.18	1.2	0.47	0.77	0.38	1.46	0.66	0.88	1	1.52	0.64	1.31	0.53	1.54	0.88	1.23	0.76	1.01	0.58	1.52	0.69	1.13	0.67	1.4	0.81	1.22	0.58	1.68	0.73	1.02	0.57	1.47	0.53	1.48	0.52	1.49	0.51	1.41	0.59	1.49	0.51	1.56	0.44
P. aromaticum	0.386	0.399	0.304	1.33	0.67	2	1.18	1.2	0.47	0.77	0.38	1.47	0.65	0.88	1	1.5	0.64	1.32	0.54	1.57	0.88	1.22	0.76	1.01	0.58	1.49	0.69	1.15	0.67	1.39	0.79	1.23	0.59	1.69	0.72	1.01	0.57	1.47	0.53	1.48	0.52	1.5	0.5	1.41	0.59	1.49	0.51	1.56	0.44
P. apiolense	0.384	0.401	0.303	1.34	0.66	2.01	1.19	1.2	0.47	0.76	0.38	1.46	0.64	0.89	1	1.53	0.63	1.31	0.53	1.54	0.89	1.22	0.76	1.01	0.58	1.52	0.69	1.12	0.68	1.39	0.8	1.23	0.58	1.69	0.72	1.02	0.57	1.48	0.52	1.49	0.51	1.49	0.51	1.42	0.58	1.49	0.51	1.56	0.44
P. giraldii	0.385	0.401	0.304	1.33	0.67	1.99	1.2	1.2	0.47	0.77	0.37	1.44	0.66	0.9	1	1.5	0.65	1.31	0.54	1.57	0.87	1.21	0.75	1.01	0.58	1.5	0.72	1.15	0.64	1.4	0.78	1.19	0.62	1.69	0.73	1.04	0.55	1.47	0.53	1.48	0.52	1.49	0.51	1.43	0.57	1.5	0.5	1.56	0.44
H. ladyginii	0.385	0.401	0.305	1.33	0.67	2	1.19	1.2	0.46	0.76	0.39	1.45	0.65	0.91	1	1.49	0.66	1.3	0.54	1.56	0.87	1.22	0.75	1.02	0.58	1.48	0.73	1.14	0.65	1.39	0.79	1.19	0.63	1.69	0.72	1.03	0.56	1.47	0.53	1.48	0.52	1.49	0.51	1.42	0.58	1.51	0.49	1.57	0.43
P. hookeri	0.385	0.401	0.304	1.34	0.66	2.02	1.19	1.19	0.47	0.76	0.38	1.45	0.65	0.9	1	1.48	0.68	1.3	0.54	1.56	0.87	1.21	0.76	1.02	0.58	1.5	0.71	1.14	0.65	1.39	0.8	1.2	0.62	1.68	0.74	1.04	0.55	1.47	0.53	1.47	0.53	1.48	0.52	1.42	0.58	1.5	0.5	1.56	0.44
P. yunnanense	0.385	0.401	0.305	1.34	0.66	2	1.2	1.19	0.47	0.75	0.37	1.45	0.65	0.9	1	1.48	0.67	1.3	0.54	1.56	0.87	1.21	0.76	1.02	0.58	1.48	0.72	1.14	0.66	1.39	0.8	1.18	0.62	1.69	0.72	1.04	0.56	1.47	0.53	1.47	0.53	1.48	0.52	1.42	0.58	1.5	0.5	1.56	0.44
L. delavayi	0.385	0.4	0.305	1.34	0.66	2	1.2	1.19	0.48	0.75	0.37	1.44	0.65	0.91	1	1.48	0.67	1.3	0.54	1.56	0.87	1.22	0.76	1.02	0.58	1.47	0.73	1.14	0.66	1.4	0.8	1.19	0.62	1.69	0.72	1.04	0.55	1.47	0.53	1.47	0.53	1.48	0.52	1.42	0.58	1.5	0.5	1.56	0.44
Boxes are colored by the relative values in the column. White represent high values and red represent low values. Condons with RSCU values larger than 1 are highlighted.
[truncated: 18 more columns]
